# Supplementary material
Source: PubMed Central journal article supplement (PMC7429243)
Supplement: NIHMS1568797-supplement-1.pdf [file NIHMS1568797-supplement-1.pdf]

**Supplemental Table 1** Annualized Change in Individual Aortic Valve Measures in Patients Without Severe Aortic Stenosis at Baseline

|                                                            | Gout (n = 46)        | No Gout (n = 456)   | P Value |
|------------------------------------------------------------|----------------------|---------------------|---------|
| Annualized change in aortic valve peak velocity, m/sec/y   | 0.22 [0.09-0.40]     | 0.19 [0.06-0.33]    | 0.30    |
| Annualized change in aortic valve mean gradient, mm Hg/y   | 3.0 [1.3-5.5]        | 2.2 [0.7-4.8]       | 0.12    |
| Annualized change in aortic valve area, cm <sup>2</sup> /y | -0.10 [-0.19, -0.04] | 0.10 [-0.19, -0.02] | 0.54    |

Data shown as median [interquartile range] and compared using Mann-Whitney test.
